# Supplementary material for: The turnover intentions and intentions to leave the country of foreign-born physicians in Finland: a cross-sectional questionnaire study
Source: Springer Nature journal article supplement (doi:10.1186/s12913-019-4487-1), 2019-09-03
Supplement: MOESM1 [file 17133136]

## MULTICULTURAL PHYSICIAN'S JOB

### BACKGROUND INFORMATION

1. Please begin by writing down the ID number in your covering letter \*

ID number:

---

4 characters remaining

2. Gender

- Man  
 Woman

3. Age

---

2 characters remaining

4. What is your mother tongue?

- Finnish  
 Swedish  
 Estonian  
 Russian  
 German  
 Other, please specify

---

5. What is your marital status?

- Single
- Married/Living together
- Separated/Divorced
- Widowed

6. If you are married/living together or in a registered partnership, what is your spouse's mother tongue?

- Finnish
- Swedish
- Estonian
- Russian
- German
- Other, please specify

---

7. Do you have any children living at home with you?

- No
- Yes, how many?

---

## **DEGREE OR QUALIFICATION DETAILS**

8. Year for the completion of the basic degree in medicine (Licentiate in Medicine or similar)

---

4 characters remaining

9. Country where you completed your basic degree in medicine(Licentiate in Medicine or similar)

- Finland
- Sweden
- Russia
- Estonia
- Germany
- Other country in the EU/EEA area
- Other country outside the EU/EEA area

**10.** In which year did you receive your license to practice your profession as a self-employed person in Finland?

---

4 characters remaining

**11.** What kind of licence do you presently hold to exercise your profession?

- Self-employed person
- Restricted licence (e.g PTL)
- Assistant (house officer)

**12.** Specialisation phase

- No specialisation (please skip to the next page)
- Specialisation in progress
- Specialised

**13.** Indicate your speciality. If you have rights to several specialities, indicate the most recent one.

- Select
- Anaesthesiology and intensive care
- Surgical specialties
- Paediatric
- Obstetrics and Gynaecology
- Psychiatry
- Radiology

- Ophthalmology
- Internal medicine specialties
- Otorhinolaryngology
- General Practice
- Occupational Health
- Neurology
- Other fields of specialization

**14.** Do you have a specialist qualification acquired in Finland?

- No
- Yes

#### **DETAILS OF MAIN OCCUPATION**

While completing it, please rate the questions and statements in the survey on the basis of your current main occupation. If you are not employed at this time, base your answers on your most recent job.

**15.** Your situation at the moment?

- Select
- Working
- I am full-time retired, participating work-life
- I am full-time retired, not participating work-life
- I am on maternity/paternity leave
- Not working for other reason

**16.** Employment sector for your main occupation

- Municipality/ joint municipal board
- State
- Private (including University)

**17.** Workplace for main occupation/working sector

- Select
- University central hospital

- Other municipal/joint municipal board hospital
- Health centre (municipal employment)
- Health centre (through temporary staffing services)
- Municipal occupational health care
- Government agency or institution
- University
- Private health clinic or centre, private practice
- Private occupational health care
- Foundation, association or organisation
- Pharmaceutical industry
- Employment service/temporary staffing agency (physicians employed temporarily in locations other than health centres)
- Other workplace

**18. Occupational title for main occupation**

- Select
- Medical director, director, chief physician, head of department, deputy chief physician
- Specialist or senior physician
- Specializing physician, doctor in training, doctor in special training in general medical practice
- General practitioner
- Occupational health physician, chief occupational health physician
- Professor
- Clinical lecturer, assistant professor
- Researcher, assistant
- Private practitioner
- Other physicians' job
- Other than physicians' job

**19. Location of main occupation**

- Large city (more than 100,000 citizens)
- Middle-size city or municipality (20,000–100,000 citizens)
- Small town or municipality (less than 20,000 citizens)

**20. Are you**

- In permanent employment?
- In fixed-term employment?
- In private practice?

**21.** Do you have managerial duties?

- No
- Yes

**22.** State whether your main occupation is

- Full-time
- Part-time, hours/week

- 
- Partial retirement, working hours/week

**23.** In your opinion, has your foreign origin been an advantage or a disadvantage when looking for a job in Finland?

- Select
- Advantage
- Advantage and disadvantage
- Disadvantage
- No significance

**24.** Have you worked in jobs other than physician's jobs in Finland?

- Select
- No
- Less than a year
- 1-3 years
- 4-10 years
- Over 10 years

## MULTICULTURALISM AND CULTURAL COMPETENCE

**25.** Have you received multicultural training?

- Select
- No
- Yes, as part of my studies to become a physician
- Yes, after graduating as a physician (e.g. workplace training, other further training)
- Yes, I have participated in a project or development work related to multiculturalism

**26.** How often on average do you meet patients from different cultures in your work?

- Select
- Never
- Daily
- Weekly
- Monthly
- Less than monthly

**27.** Are there any colleagues of foreign origin in your work community?

- Select
- None
- There are clearly fewer persons of foreign origin than those of Finnish origin
- There an equal number or an almost equal number of persons of foreign origin as those of Finnish origin
- There are clearly more persons of foreign origin than those of Finnish origin

**28.** To what extent do you deal with colleagues of foreign origin in your workplace?

- Select
- Never
- Daily
- Weekly
- Monthly
- Less than monthly

29. Please read the following statements associated with multiculturalism. For each statement, select the alternative that best describes your opinion.

|                                                                                                                                                      | Fully disagree        | Somewhat disagree     | Neither agree nor disagree | Somewhat agree        | Fully agree           |
|------------------------------------------------------------------------------------------------------------------------------------------------------|-----------------------|-----------------------|----------------------------|-----------------------|-----------------------|
| I consider it an enrichment to have friendships with people from different cultural backgrounds.                                                     | <input type="radio"/> | <input type="radio"/> | <input type="radio"/>      | <input type="radio"/> | <input type="radio"/> |
| Cultural diversity is also an enrichment.                                                                                                            | <input type="radio"/> | <input type="radio"/> | <input type="radio"/>      | <input type="radio"/> | <input type="radio"/> |
| I find it exciting to treat patients with a migration background.                                                                                    | <input type="radio"/> | <input type="radio"/> | <input type="radio"/>      | <input type="radio"/> | <input type="radio"/> |
| I consider working in a cross-cultural team an enrichment.                                                                                           | <input type="radio"/> | <input type="radio"/> | <input type="radio"/>      | <input type="radio"/> | <input type="radio"/> |
| I enjoy talking to people who have migrated to Finland about their experiences here.                                                                 | <input type="radio"/> | <input type="radio"/> | <input type="radio"/>      | <input type="radio"/> | <input type="radio"/> |
| The interaction with people from other cultural backgrounds helps me reflect upon my own cultural background.                                        | <input type="radio"/> | <input type="radio"/> | <input type="radio"/>      | <input type="radio"/> | <input type="radio"/> |
| By communicating with patients with a migration background I can learn about different cultural orientations.                                        | <input type="radio"/> | <input type="radio"/> | <input type="radio"/>      | <input type="radio"/> | <input type="radio"/> |
| I would like to make use of training, advising and educational offers, in order to improve my understanding of patients with a migration background. | <input type="radio"/> | <input type="radio"/> | <input type="radio"/>      | <input type="radio"/> | <input type="radio"/> |
| It is important for me to treat patients according to their cultural needs and individual values.                                                    | <input type="radio"/> | <input type="radio"/> | <input type="radio"/>      | <input type="radio"/> | <input type="radio"/> |
| I find it an imposition, when people who migrated to Finland a long time ago, cannot speak Finnish properly.                                         | <input type="radio"/> | <input type="radio"/> | <input type="radio"/>      | <input type="radio"/> | <input type="radio"/> |
| People who migrated to Finland should adapt to society, not the other way around.                                                                    | <input type="radio"/> | <input type="radio"/> | <input type="radio"/>      | <input type="radio"/> | <input type="radio"/> |
| Institutions and the public pay too much attention to the special wishes of migrants.                                                                | <input type="radio"/> | <input type="radio"/> | <input type="radio"/>      | <input type="radio"/> | <input type="radio"/> |
| I have the impression that migrants often assume discrimination, when in fact general rules are simply being enforced.                               | <input type="radio"/> | <input type="radio"/> | <input type="radio"/>      | <input type="radio"/> | <input type="radio"/> |



30. Please read the following statements associated with multicultural customer/patient work. For each statement, select the alternative that best describes your opinion.

|                                                                                                                                                                                                                                 | Fully disagree        | Somewhat disagree     | Neither agree nor disagree | Somewhat agree        | Fully agree           |
|---------------------------------------------------------------------------------------------------------------------------------------------------------------------------------------------------------------------------------|-----------------------|-----------------------|----------------------------|-----------------------|-----------------------|
| With patients who do not understand Finnish very well, I take more time to explain the treatment options to them.                                                                                                               | <input type="radio"/> | <input type="radio"/> | <input type="radio"/>      | <input type="radio"/> | <input type="radio"/> |
| In order to achieve the agreed treatment goal, I ask patients with a migration background what they need in terms of support.                                                                                                   | <input type="radio"/> | <input type="radio"/> | <input type="radio"/>      | <input type="radio"/> | <input type="radio"/> |
| With patients who do not understand Finnish very well, I take more time to discuss their expectations and fears.                                                                                                                | <input type="radio"/> | <input type="radio"/> | <input type="radio"/>      | <input type="radio"/> | <input type="radio"/> |
| Culturally specific factors of people (e.g. values, behavior norms, beliefs) influence their understanding of disease significantly, and should therefore be assessed and taken into consideration by healthcare professionals. | <input type="radio"/> | <input type="radio"/> | <input type="radio"/>      | <input type="radio"/> | <input type="radio"/> |
| I consider the values of patients in relation to family, religion, etc., if they seem relevant for the treatment.                                                                                                               | <input type="radio"/> | <input type="radio"/> | <input type="radio"/>      | <input type="radio"/> | <input type="radio"/> |
| In my professional interaction with patients with a migration background, I often feel unsure, angry and frustrated.                                                                                                            | <input type="radio"/> | <input type="radio"/> | <input type="radio"/>      | <input type="radio"/> | <input type="radio"/> |
| I often find it difficult to relate to the elaborations of my patients, when their socio-cultural background is quite different from my own.                                                                                    | <input type="radio"/> | <input type="radio"/> | <input type="radio"/>      | <input type="radio"/> | <input type="radio"/> |
| I get impatient when I cannot make myself understood with patients with a migration background.                                                                                                                                 | <input type="radio"/> | <input type="radio"/> | <input type="radio"/>      | <input type="radio"/> | <input type="radio"/> |
| I find it difficult to speak slowly in lay language with people who struggle to understand my instructions.                                                                                                                     | <input type="radio"/> | <input type="radio"/> | <input type="radio"/>      | <input type="radio"/> | <input type="radio"/> |
| I prefer treating patients from my own cultural background, than those who seem foreign to me.                                                                                                                                  | <input type="radio"/> | <input type="radio"/> | <input type="radio"/>      | <input type="radio"/> | <input type="radio"/> |
| The disease concepts of patients with a migration background are not relevant for treatment success.                                                                                                                            | <input type="radio"/> | <input type="radio"/> | <input type="radio"/>      | <input type="radio"/> | <input type="radio"/> |
| Within the migrant population, there are hardly any differences in terms of health opportunities and disease risks.                                                                                                             | <input type="radio"/> | <input type="radio"/> | <input type="radio"/>      | <input type="radio"/> | <input type="radio"/> |

My professional perception, assessment, and behaviour remain untouched by my cultural imprinting.

The migration experience is a critical life event and can be accompanied by psychosocial stress and health burden.

## WORK AND WORK COMMUNITY

While completing it, please rate the questions and statements in the survey on the basis of your current main occupation. If you are not employed at this time, base your answers on your most recent job. For each statement, select the alternative that best describes your opinion.

**31.** In the following items, you will be asked to rate the activities of your work unit. Think here of the work unit (department, health center/clinic, small group) that is the most essential to your work.

|                                                                           | Fully disagree        | Somewhat disagree     | Neither agree nor disagree | Somewhat agree        | Fully agree           |
|---------------------------------------------------------------------------|-----------------------|-----------------------|----------------------------|-----------------------|-----------------------|
| People keep each other informed about work related issues in the practice | <input type="radio"/> | <input type="radio"/> | <input type="radio"/>      | <input type="radio"/> | <input type="radio"/> |
| There are real attempts to share information throughout the practice      | <input type="radio"/> | <input type="radio"/> | <input type="radio"/>      | <input type="radio"/> | <input type="radio"/> |
| We have a "we are in it together" attitude                                | <input type="radio"/> | <input type="radio"/> | <input type="radio"/>      | <input type="radio"/> | <input type="radio"/> |
| People feel understood and accepted by each other                         | <input type="radio"/> | <input type="radio"/> | <input type="radio"/>      | <input type="radio"/> | <input type="radio"/> |

**32.** The following statements refer to procedures in your workplace

|                                                                                                              | Fully disagree        | Somewhat disagree     | Neither agree nor disagree | Somewhat agree        | Fully agree           |
|--------------------------------------------------------------------------------------------------------------|-----------------------|-----------------------|----------------------------|-----------------------|-----------------------|
| Everybody is entitled to express an opinion and their experience if related to matters concerning themselves | <input type="radio"/> | <input type="radio"/> | <input type="radio"/>      | <input type="radio"/> | <input type="radio"/> |
| Decisions taken in our workplace have been consistent                                                        | <input type="radio"/> | <input type="radio"/> | <input type="radio"/>      | <input type="radio"/> | <input type="radio"/> |
| Decisions in our workplace are not biased                                                                    | <input type="radio"/> | <input type="radio"/> | <input type="radio"/>      | <input type="radio"/> | <input type="radio"/> |

**33.** The following statements refer to offering and receiving help at your workplace

|                                                              | Rarely or never       | Not often             | To some extent        | Fairly often          | Very often            |
|--------------------------------------------------------------|-----------------------|-----------------------|-----------------------|-----------------------|-----------------------|
| I receive support and help from my coworkers when I need to  | <input type="radio"/> | <input type="radio"/> | <input type="radio"/> | <input type="radio"/> | <input type="radio"/> |
| I receive support and help from my supervisor when I need to | <input type="radio"/> | <input type="radio"/> | <input type="radio"/> | <input type="radio"/> | <input type="radio"/> |
| I help and support my coworkers when they need it            | <input type="radio"/> | <input type="radio"/> | <input type="radio"/> | <input type="radio"/> | <input type="radio"/> |

**34.** How well do the following statements describe you?

|                                                           | Fully disagree        | Somewhat disagree     | Neither agree nor disagree | Somewhat agree        | Fully agree           |
|-----------------------------------------------------------|-----------------------|-----------------------|----------------------------|-----------------------|-----------------------|
| Generally speaking I am very satisfied with this job      | <input type="radio"/> | <input type="radio"/> | <input type="radio"/>      | <input type="radio"/> | <input type="radio"/> |
| My job requires that I learn new things.                  | <input type="radio"/> | <input type="radio"/> | <input type="radio"/>      | <input type="radio"/> | <input type="radio"/> |
| I get to do a variety of different things in my job.      | <input type="radio"/> | <input type="radio"/> | <input type="radio"/>      | <input type="radio"/> | <input type="radio"/> |
| I have an opportunity to develop my own special abilities | <input type="radio"/> | <input type="radio"/> | <input type="radio"/>      | <input type="radio"/> | <input type="radio"/> |

**35.** Discrimination means an unequal treatment of people (without acceptable reason) and placing them in an unfavourable position on the basis of belonging to a certain group. Have you personally experienced discrimination in your workplace in the past 12 months?

|                                   | Hardly ever           | Not often             | Sometimes             | Fairly often          | Very often or continuously |
|-----------------------------------|-----------------------|-----------------------|-----------------------|-----------------------|----------------------------|
| From superior or management?      | <input type="radio"/> | <input type="radio"/> | <input type="radio"/> | <input type="radio"/> | <input type="radio"/>      |
| From colleagues/fellow employees? | <input type="radio"/> | <input type="radio"/> | <input type="radio"/> | <input type="radio"/> | <input type="radio"/>      |
| From patients/clients?            | <input type="radio"/> | <input type="radio"/> | <input type="radio"/> | <input type="radio"/> | <input type="radio"/>      |

**36.** Intention to change job

|                                                                                     | No                    | Possibly              | Yes                   |
|-------------------------------------------------------------------------------------|-----------------------|-----------------------|-----------------------|
| Have you planned changing employment?                                               | <input type="radio"/> | <input type="radio"/> | <input type="radio"/> |
| Have you had plans for moving to work in another country during the next 12 months? | <input type="radio"/> | <input type="radio"/> | <input type="radio"/> |

## WORKING IN FINLAND

**37.** Have the following factors prevented you from getting a job you want or complicated getting it or prevented your working in Finland during the past two years?

|                                                                                                              | Not at<br>all         | To some<br>extent     | A<br>lot              |
|--------------------------------------------------------------------------------------------------------------|-----------------------|-----------------------|-----------------------|
| Lack of language skills (Finnish/Swedish)                                                                    | <input type="radio"/> | <input type="radio"/> | <input type="radio"/> |
| Inadequate or unsuitable training (e.g. your previous profession or training is not acknowledged in Finland) | <input type="radio"/> | <input type="radio"/> | <input type="radio"/> |
| Lack of work experience                                                                                      | <input type="radio"/> | <input type="radio"/> | <input type="radio"/> |
| Employer attitudes                                                                                           | <input type="radio"/> | <input type="radio"/> | <input type="radio"/> |
| It is difficult to find information about job vacancies                                                      | <input type="radio"/> | <input type="radio"/> | <input type="radio"/> |
| Insufficient relationships with people of Finnish origin who could help you find a job                       | <input type="radio"/> | <input type="radio"/> | <input type="radio"/> |
| Difficulty in finding housing                                                                                | <input type="radio"/> | <input type="radio"/> | <input type="radio"/> |
| Your own uncertainty and fear with regard to starting a job                                                  | <input type="radio"/> | <input type="radio"/> | <input type="radio"/> |
| Adherence to a religion or belief                                                                            | <input type="radio"/> | <input type="radio"/> | <input type="radio"/> |
| Reconciling work and family life                                                                             | <input type="radio"/> | <input type="radio"/> | <input type="radio"/> |
| Other, please specify _____                                                                                  | <input type="radio"/> | <input type="radio"/> | <input type="radio"/> |

**38.** Have the following factors promoted your employment or participation in working life in Finland during the last two years?

|                                                      | I have not<br>participated | I have<br>participated,<br>but I haven't<br>found it useful | I have<br>participated<br>and found it<br>somewhat<br>useful | I have<br>participated<br>and found it<br>very useful |
|------------------------------------------------------|----------------------------|-------------------------------------------------------------|--------------------------------------------------------------|-------------------------------------------------------|
| Integration training                                 | <input type="radio"/>      | <input type="radio"/>                                       | <input type="radio"/>                                        | <input type="radio"/>                                 |
| Employment services                                  | <input type="radio"/>      | <input type="radio"/>                                       | <input type="radio"/>                                        | <input type="radio"/>                                 |
| Employer-provided language training                  | <input type="radio"/>      | <input type="radio"/>                                       | <input type="radio"/>                                        | <input type="radio"/>                                 |
| Other than employer-provided language training       | <input type="radio"/>      | <input type="radio"/>                                       | <input type="radio"/>                                        | <input type="radio"/>                                 |
| Vocational education at the workplace                | <input type="radio"/>      | <input type="radio"/>                                       | <input type="radio"/>                                        | <input type="radio"/>                                 |
| Vocational education elsewhere than at the workplace | <input type="radio"/>      | <input type="radio"/>                                       | <input type="radio"/>                                        | <input type="radio"/>                                 |

Other,      
 please specify \_\_\_\_\_

**39.** How often on average do you have challenges in communicating in Finnish in the following work-related situations?

|                                               | Hardly ever           | Not often             | Sometimes             | Fairly often          | Very often or continuously | <b>I do not need Finnish in my work</b> |
|-----------------------------------------------|-----------------------|-----------------------|-----------------------|-----------------------|----------------------------|-----------------------------------------|
| Face-to-face communication with patients      | <input type="radio"/> | <input type="radio"/> | <input type="radio"/> | <input type="radio"/> | <input type="radio"/>      | <input type="radio"/>                   |
| Face-to-face communication with co-workers    | <input type="radio"/> | <input type="radio"/> | <input type="radio"/> | <input type="radio"/> | <input type="radio"/>      | <input type="radio"/>                   |
| Meetings in workplace                         | <input type="radio"/> | <input type="radio"/> | <input type="radio"/> | <input type="radio"/> | <input type="radio"/>      | <input type="radio"/>                   |
| Keeping up with professional literature       | <input type="radio"/> | <input type="radio"/> | <input type="radio"/> | <input type="radio"/> | <input type="radio"/>      | <input type="radio"/>                   |
| Recording data in patient information systems | <input type="radio"/> | <input type="radio"/> | <input type="radio"/> | <input type="radio"/> | <input type="radio"/>      | <input type="radio"/>                   |
| Electronic communication                      | <input type="radio"/> | <input type="radio"/> | <input type="radio"/> | <input type="radio"/> | <input type="radio"/>      | <input type="radio"/>                   |
| Communication over the phone                  | <input type="radio"/> | <input type="radio"/> | <input type="radio"/> | <input type="radio"/> | <input type="radio"/>      | <input type="radio"/>                   |

**40.** To what extent has each of the things listed below disturbed, worried or stressed you in your job in the past six months?

|                                                                              | Hardly ever           | Not often             | Sometimes             | Fairly often          | Very often or continuously |
|------------------------------------------------------------------------------|-----------------------|-----------------------|-----------------------|-----------------------|----------------------------|
| Constant rush and pressure due to incompleted work                           | <input type="radio"/> | <input type="radio"/> | <input type="radio"/> | <input type="radio"/> | <input type="radio"/>      |
| Not enough time to perform work properly                                     | <input type="radio"/> | <input type="radio"/> | <input type="radio"/> | <input type="radio"/> | <input type="radio"/>      |
| Changes in electronic information systems                                    | <input type="radio"/> | <input type="radio"/> | <input type="radio"/> | <input type="radio"/> | <input type="radio"/>      |
| Troublesome, poorly functioning electronic information systems               | <input type="radio"/> | <input type="radio"/> | <input type="radio"/> | <input type="radio"/> | <input type="radio"/>      |
| Personnel turnover, short-term temps                                         | <input type="radio"/> | <input type="radio"/> | <input type="radio"/> | <input type="radio"/> | <input type="radio"/>      |
| Patients' expectations frequently differ from those of health care personnel | <input type="radio"/> | <input type="radio"/> | <input type="radio"/> | <input type="radio"/> | <input type="radio"/>      |



**46.** On what grounds were you granted a resident permit in Finland?

- As an ethnic returnee (e.g., Estonian or Russian)
- As the spouse or child of a native of Finland
- As the spouse or child of an immigrant residing permanently in Finland
- As an employment-based immigrant
- As an asylum seeker
- As a refugee
- Other grounds

**HEALTH AND WELLBEING**

**47.** What is your state of health compared to others of your age?

- Good
- Rather good
- Average
- Rather poor
- Poor

**48.** Assume that your work ability at its best has a value of 10 and 0 would mean that you could not work at all. How many points would you give to your current work ability?

0 1 2 3 4 5 6 7 8 9 10

Very bad             Very good

**49.** Stress means a situation when a person feels tense, restless, nervous, or anxious, or is unable to sleep at night because his or her mind is troubled all the time. Do you feel that kind of stress these days?

- Not at all
- Just a little
- Some
- Quite a lot

Very much

**50.** The following questions relate to your well-being during the past few weeks. Please select the most suitable option for each statement.

|                                                                 | Not at all            | Not more than usual   | Somewhat more than usual | Much more than usual  |
|-----------------------------------------------------------------|-----------------------|-----------------------|--------------------------|-----------------------|
| Have you recently lost much sleep over worry?                   | <input type="radio"/> | <input type="radio"/> | <input type="radio"/>    | <input type="radio"/> |
| Have you recently felt constantly under strain?                 | <input type="radio"/> | <input type="radio"/> | <input type="radio"/>    | <input type="radio"/> |
| Have you recently felt you couldn't overcome your difficulties? | <input type="radio"/> | <input type="radio"/> | <input type="radio"/>    | <input type="radio"/> |
| Have you recently been feeling unhappy and depressed?           | <input type="radio"/> | <input type="radio"/> | <input type="radio"/>    | <input type="radio"/> |

**51.** How often during the last four weeks have you had the following symptoms?

|                                                                       | Never                 | 1-3 nights/month      | Approximately one night/week | 2-4 nights/week       | 5-6 nights/week       | Every night           |
|-----------------------------------------------------------------------|-----------------------|-----------------------|------------------------------|-----------------------|-----------------------|-----------------------|
| Having trouble falling asleep                                         | <input type="radio"/> | <input type="radio"/> | <input type="radio"/>        | <input type="radio"/> | <input type="radio"/> | <input type="radio"/> |
| Waking up several times per night                                     | <input type="radio"/> | <input type="radio"/> | <input type="radio"/>        | <input type="radio"/> | <input type="radio"/> | <input type="radio"/> |
| Having trouble staying asleep (including waking up too early)         | <input type="radio"/> | <input type="radio"/> | <input type="radio"/>        | <input type="radio"/> | <input type="radio"/> | <input type="radio"/> |
| Waking up after your usual amount of sleep feeling tired and worn out | <input type="radio"/> | <input type="radio"/> | <input type="radio"/>        | <input type="radio"/> | <input type="radio"/> | <input type="radio"/> |

**52.** In the space below you can write your notes and opinions about this study and about your experiences of working in Finland. Thank you for your answers!

---

---

---

[Break]



0% completed
